# Supplementary material
Source: Springer Nature journal article supplement (https://www.springermedizin.de/resource/supplementary/12943_2013_1358_MOESM3_ESM.pdf/9552796)
Supplement: MOESM3 [file 9552796]

| <b>Cell line</b> | <b>GENETIC BACKGROUND</b> | <b>MGMT fmol/<math>\mu</math>g DNA</b> | <b>MGMT molecules/cell</b> | <b>MGMT STATUS</b> |
|------------------|---------------------------|----------------------------------------|----------------------------|--------------------|
| <b>Mel-juso</b>  | mutNRAS                   | n.d.                                   | ~0                         | deficient          |
| <b>WM1361</b>    | mutNRAS                   | 4.4                                    | ~8000                      | proficient         |
| <b>MM485</b>     | mutNRAS                   | n.d.                                   | ~0                         | deficient          |
| <b>WM852</b>     | mutNRAS                   | n.d.                                   | ~0                         | deficient          |
| <b>SKMEL2</b>    | mutKRAS                   | 12.8                                   | ~23300                     | proficient         |
| <b>D10</b>       | mutBRAF                   | 13.1                                   | ~23800                     | proficient         |
| <b>WM266.4</b>   | mutBRAF                   | n.d.                                   | ~0                         | deficient          |
| <b>501MEL</b>    | mutBRAF                   | 6.6                                    | ~12000                     | proficient         |
| <b>WM9</b>       | mutBRAF                   | n.d.                                   | ~0                         | deficient          |
| <b>WM98</b>      | mutBRAF                   | n.d.                                   | ~0                         | deficient          |
| <b>A375P</b>     | mutBRAF                   | 5.6                                    | ~10200                     | proficient         |
| <b>MCF7</b>      | (positive control)        | 8.8                                    | ~16000                     | proficient         |

**Supplementary Table 2. MGMT status of a panel of 10 melanoma cell lines**

MGMT activity in 5 mutBRAF and 5 mutNRAS melanoma cell lines. Exponentially growing cells were harvested, gDNA was isolated and the presence of MGMT activity as well as the concentration of MGMT was determined. N.d.: not detectable.
